# Supplementary material for: Non-noble metallic Cu with three different roles in a Cu doped ZnO/Cu/g-C3N4 heterostructure for enhanced Z-scheme photocatalytic activity
Source: Royal Society of Chemistry journal article supplement (doi:10.1039/d1nj01044a), 2021-01-01
Supplement: d1nj01044a1.pdf [file d1nj01044a1.pdf]

## Supplementary

### **Non-Noble Metallic Cu with Three Different Roles in Cu doped ZnO/Cu/g-C<sub>3</sub>N<sub>4</sub> Heterostructure for Enhanced Z-Scheme Photocatalytic Activity**

Mohammed Abdullah Bajiri<sup>1</sup>, Abdo Hezam<sup>2</sup>, K. Namratha<sup>3</sup>, Basheer M. Al-Maswari<sup>4</sup>

H .S.BhojyaNaik\*<sup>1</sup>, K. Byrappa<sup>5</sup>, Nabil Al-Zaqri<sup>6</sup>, Ali Alsalmeh<sup>6</sup>, Fahad A. Alharthi<sup>6</sup>

<sup>1</sup>Department of Studies and Research in Industrial Chemistry, School of Chemical Sciences,  
Kuvempu University, Shankaraghatta-577 451, India

<sup>2</sup>Department of Physics, Ibb University, Ibb, Yemen

<sup>3</sup> DOS in Earth Science, University of Mysore, Mysore-570006, India

<sup>4</sup>Department of Chemistry, Yuvaraja's College(Autonomous), University of Mysore, India

<sup>5</sup>Adichunchanagiri University, N.H. 75, B. G. Nagara, Mandya, 571448, India

<sup>6</sup>Department of Chemistry, College of Science, King Saud University, P.O. Box 2455, Riyadh,  
11451, Saudi Arabia.

\*Corresponding author: hsb\_naik@rediffmail.com

## 1. XRD calculation data

Table S1: The lattice parameters, crystal size, and micro-strain.

| Samples    | 2θ      | θradians | FWHM (β) | FWHM(radians) | Cosθ     | Sinθ     | d=λ/2sinθ |
|------------|---------|----------|----------|---------------|----------|----------|-----------|
| ZnO        | 36.2249 | 0.316122 | 0.2728   | 0.004761258   | 0.950448 | 0.310883 | 2.476816  |
| ZnOCugc200 | 36.1718 | 0.315659 | 0.3552   | 0.00619941    | 0.950592 | 0.310443 | 2.48033   |
| ZnOCugc300 | 36.234  | 0.316201 | 0.4337   | 0.007569493   | 0.950424 | 0.310958 | 2.476215  |
| ZnOCugc100 | 36.2176 | 0.316058 | 0.3398   | 0.005930629   | 0.950468 | 0.310822 | 2.477299  |
| ZnOCu      | 36.7001 | 0.320269 | 0.2857   | 0.004986406   | 0.949151 | 0.314822 | 2.445829  |

| SIZE     | Micro-strain (ε) | Micro-strain (ε) 10 <sup>-3</sup> | d-spacing [Å] | a=b    | c      | c/a Ratio |
|----------|------------------|-----------------------------------|---------------|--------|--------|-----------|
| 30.63755 | 0.00113133       | 1.13133                           | 2.47777       | 3.2543 | 5.2067 | 1.599945  |
| 23.52663 | 0.00147328       | 1.47328                           | 2.48129       | 3.2638 | 5.2128 | 1.597157  |
| 19.27171 | 0.00179856       | 1.79856                           | 2.47717       | 3.2582 | 5.2052 | 1.597569  |
| 24.59608 | 0.00140922       | 1.40922                           | 2.47826       | 3.2534 | 5.2085 | 1.600941  |
| 29.29418 | 0.00118321       | 1.18321                           | 2.48758       | 3.2659 | 5.2278 | 1.600723  |

2θ values ((θ) is Bragg's diffraction angle) were taken from the XRD data. The (hkl) of XRD data represents (101). The θ and the full width at half maximum of XRD (FWHM (β)) were converted to FWHM in radian (radian = 180π degrees).

d value calculated by using the formula:

$$d = \lambda / 2 \sin \theta \quad (1)$$

λ is the wavelength of X-ray (1.54 Å).

The average crystal size (nm) of the particles can have been calculated by the formula:

$$\text{The average size of the crystal} = (0.9\lambda) / (\text{FWHM} * \cos \theta) \quad (2)$$

FWHM radian and cosθ have been calculated earlier.

Micro-strain (ε) 10<sup>-3</sup> was calculated by the represent formula:

$$\text{Micro-strain } (\epsilon) \cdot 10^{-3} = (\text{FWHM radian} \cdot \cos\theta / 4) \cdot 10^{-3} \quad (3)$$

The calculation of lattice constants a, b, c was done by using this formula:

$$d = \frac{1}{\sqrt{4/3(h^2 + hk + k^2)/a^2 + l^2/c^2}} \quad (4)$$

d represents the d-spacing in angstrom [ $\text{\AA}$ ] which will be collected from the XRD data, and (hkl) represented (101).

## **2. Roles of Cu in Cu doped ZnO/Cu/g-C<sub>3</sub>N<sub>4</sub>**

To further prove the roles of Cu, Cu doped ZnO/g-C<sub>3</sub>N<sub>4</sub> and ZnO/g-C<sub>3</sub>N<sub>4</sub> heterostructures were prepared. The photocatalytic performance of ZnO/g-C<sub>3</sub>N<sub>4</sub> and ZnO/gC<sub>3</sub>N<sub>4</sub> were compared with that of Cu doped/Cu/gC<sub>3</sub>N<sub>4</sub>.

### **2.1 Synthesis of ZnO/g-C<sub>3</sub>N<sub>4</sub>**

ZnCl<sub>2</sub> was dissolved in deionized water. Then 1.34 g NaOH and the prepared 0.02 g-C<sub>3</sub>N<sub>4</sub> were added to the ZnCl<sub>2</sub> (0.67 M, in 10 ml) aqueous solution. The mixture was transferred to autoclave and heated at 80 °C for 24h in an air oven. The obtained samples were washed several times with ultrapure water and ethanol and dried at 80 °C for 12 h.

### **2.2 Synthesis of Cu doped ZnO/gC<sub>3</sub>N<sub>4</sub>**

About 20 mg of the prepared g-C<sub>3</sub>N<sub>4</sub> was added to a beaker that contains 50 ml ethanol and 20 ml distilled water. The solution was maintained at 6 pH by H<sub>2</sub>SO<sub>4</sub> and a suitable amount of the 100 mg of Cu doped ZnO was added. The mixture was sonicated for 1 h, followed by stirring for 24 h. The product was collected by centrifugation, followed by washing with distilled water several times, and dried at 80 °C on a hot plate. In the end, fine powder of Cu doped ZnO/gC<sub>3</sub>N<sub>4</sub> was obtained.

### **2.3 Photocatalytic performance comparison**

Photocatalytic degradation of MB on ZnO/g-C<sub>3</sub>N, Cu doped ZnO/g-C<sub>3</sub>N<sub>4</sub>, Cu doped ZnO/Cu/g-C<sub>3</sub>N<sub>4</sub> are after 60 min sunlight irradiation is compared in Figure S1. 98%, 76%, and 61% of MB were degraded on ZnO/g-C<sub>3</sub>N, Cu doped ZnO/g-C<sub>3</sub>N<sub>4</sub>, and Cu doped ZnO/Cu/g-C<sub>3</sub>N<sub>4</sub>, respectively. Obviously, ZnO/g-C<sub>3</sub>N<sub>4</sub> exhibited the lowest photocatalytic performance. After

doping the ZnO with Cu, the MB degradation performance increased from 61% to 76% on Cu doped ZnO/g-C<sub>3</sub>N<sub>4</sub>. Cu doped ZnO/Cu/g-C<sub>3</sub>N<sub>4</sub> showed the highest degradation performance. Doping of ZnO with Cu enhanced the light absorption in the visible area therefore Cu doped ZnO/g-C<sub>3</sub>N<sub>4</sub> shows higher activity than ZnO/g-C<sub>3</sub>N<sub>4</sub>. The dramatic increase in the MB degradation on Cu doped ZnO/Cu/g-C<sub>3</sub>N<sub>4</sub> is due to (1) the enhanced charge transport from CB of ZnO to VB of Cu induced by the electron mediator Cu (2) Cu plays also as co-catalyst leading to further improvement in the MB degradation performance.

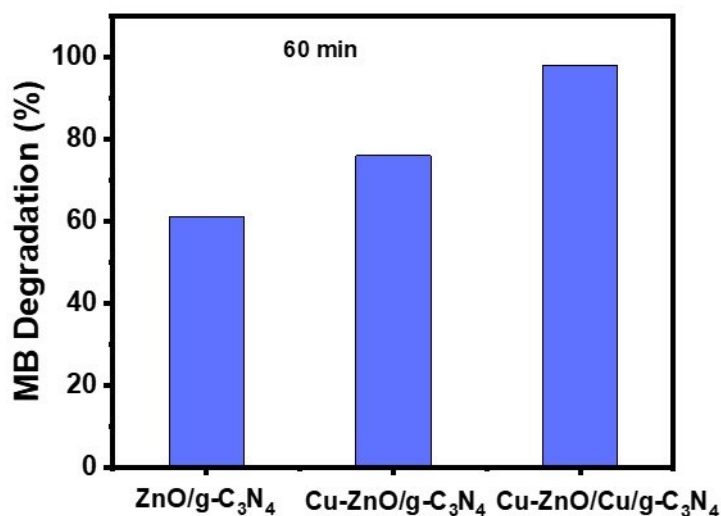

Figure S1. MB degradation on ZnO/g-C<sub>3</sub>N<sub>4</sub>, Cu doped ZnO/g-C<sub>3</sub>N<sub>4</sub>, Cu doped ZnO/Cu/g-C<sub>3</sub>N<sub>4</sub> are after 60 min sunlight irradiation

XPS analysis confirmed the presence of both Cu<sup>0</sup> and Cu<sup>2+</sup> that Cu which clearly supports the assumption of different roles of Cu in Cu doped ZnO/Cu/g-C<sub>3</sub>N<sub>4</sub> including dopant (Cu<sup>2+</sup>), electrons mediator (Cu<sup>0</sup>), and co-catalyst (Cu<sup>0</sup>). DRS results showed that the bandgap of Cu-ZnO

is 2.75 which is much lower than that of pure ZnO (3.37 eV). This decrease in the bandgap could enhance the absorption of the visible light which in turn enhances photocatalytic activity.

### 3. Mass spectroscopy of the LC-MS

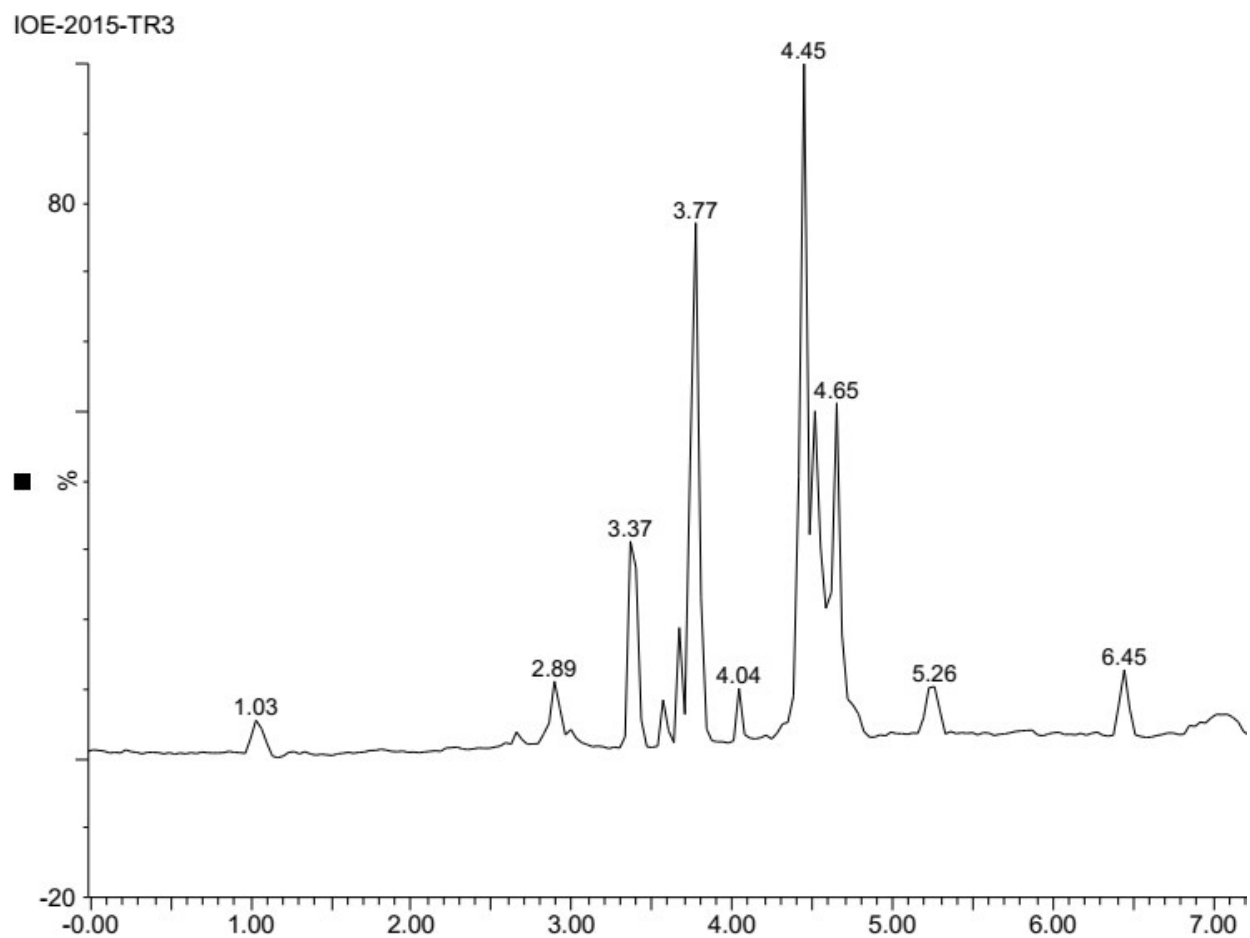

Figure S2. Liquid chromatography spectrum of intermediate product for the degradation of RhB.

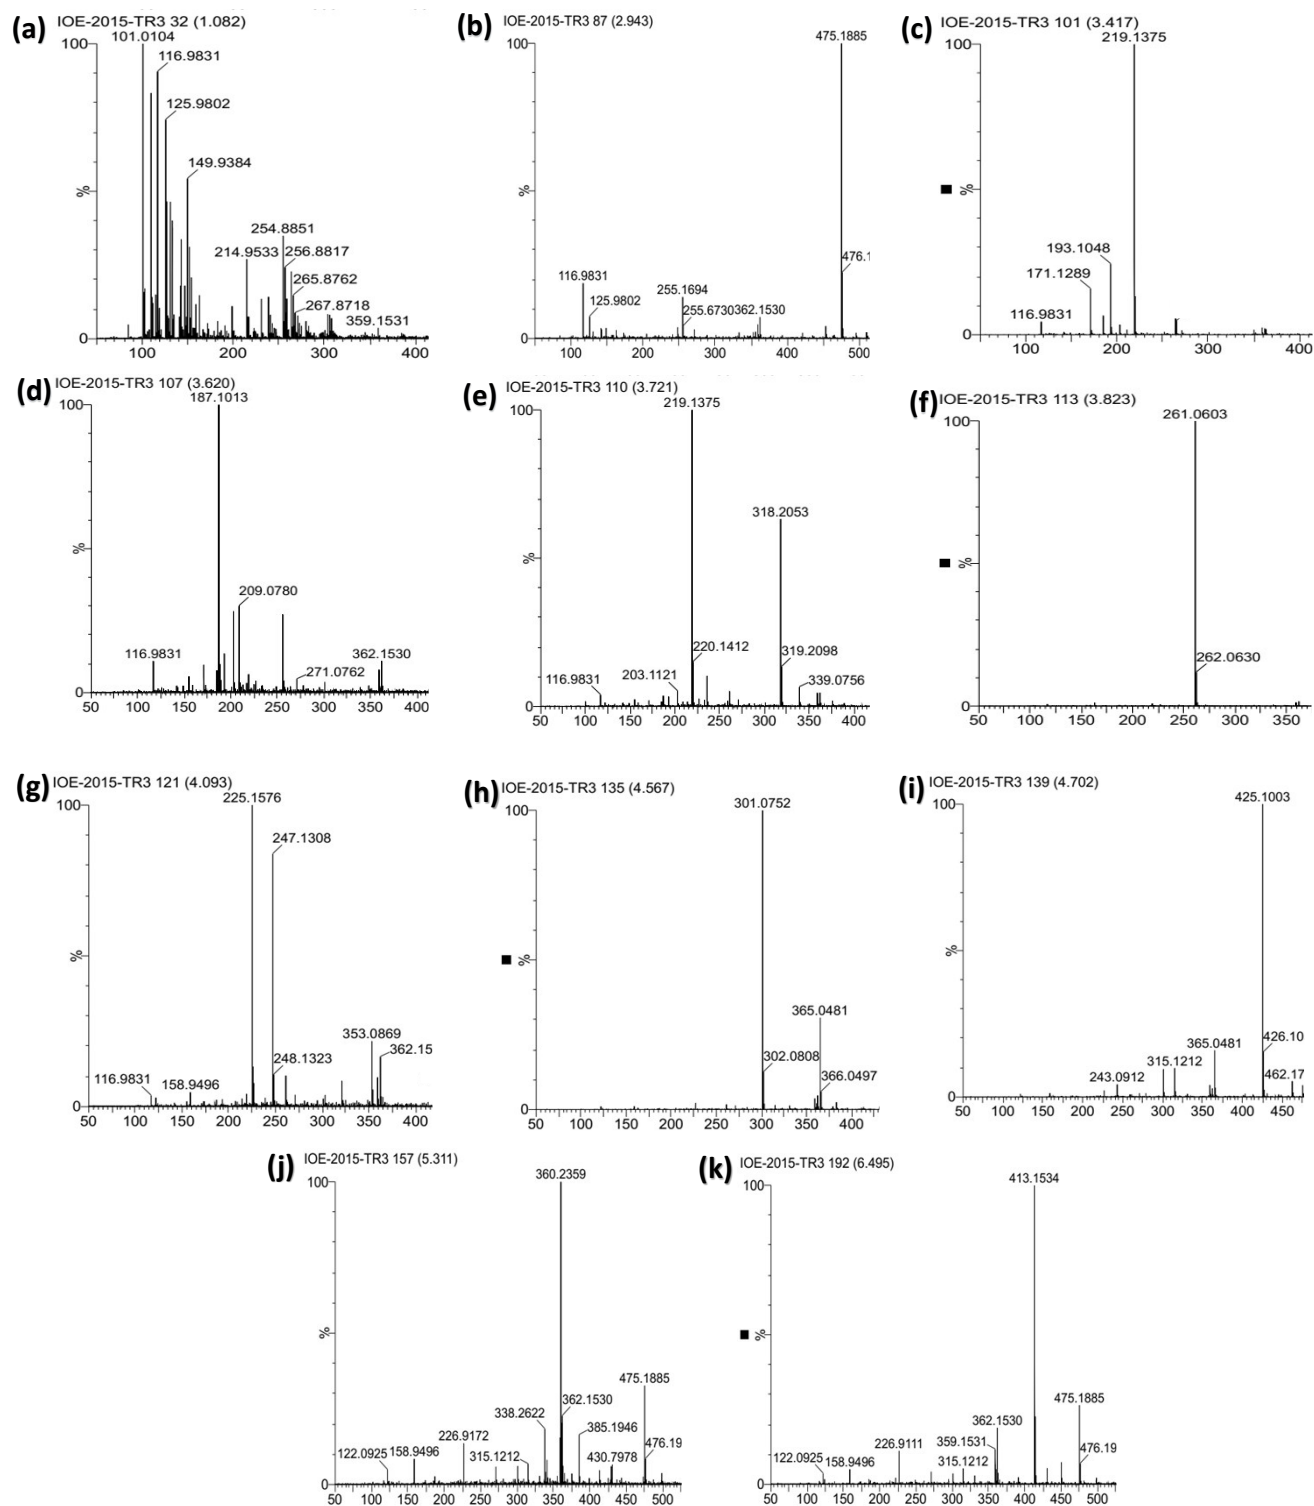

Figure S3. MS spectra of intermediate product for the degradation of RhB.
